# Supplementary material
Source: Springer Nature journal article supplement (https://www.springermedizin.de/resource/supplementary/13229_2010_24_MOESM10_ESM.pdf/9676032)

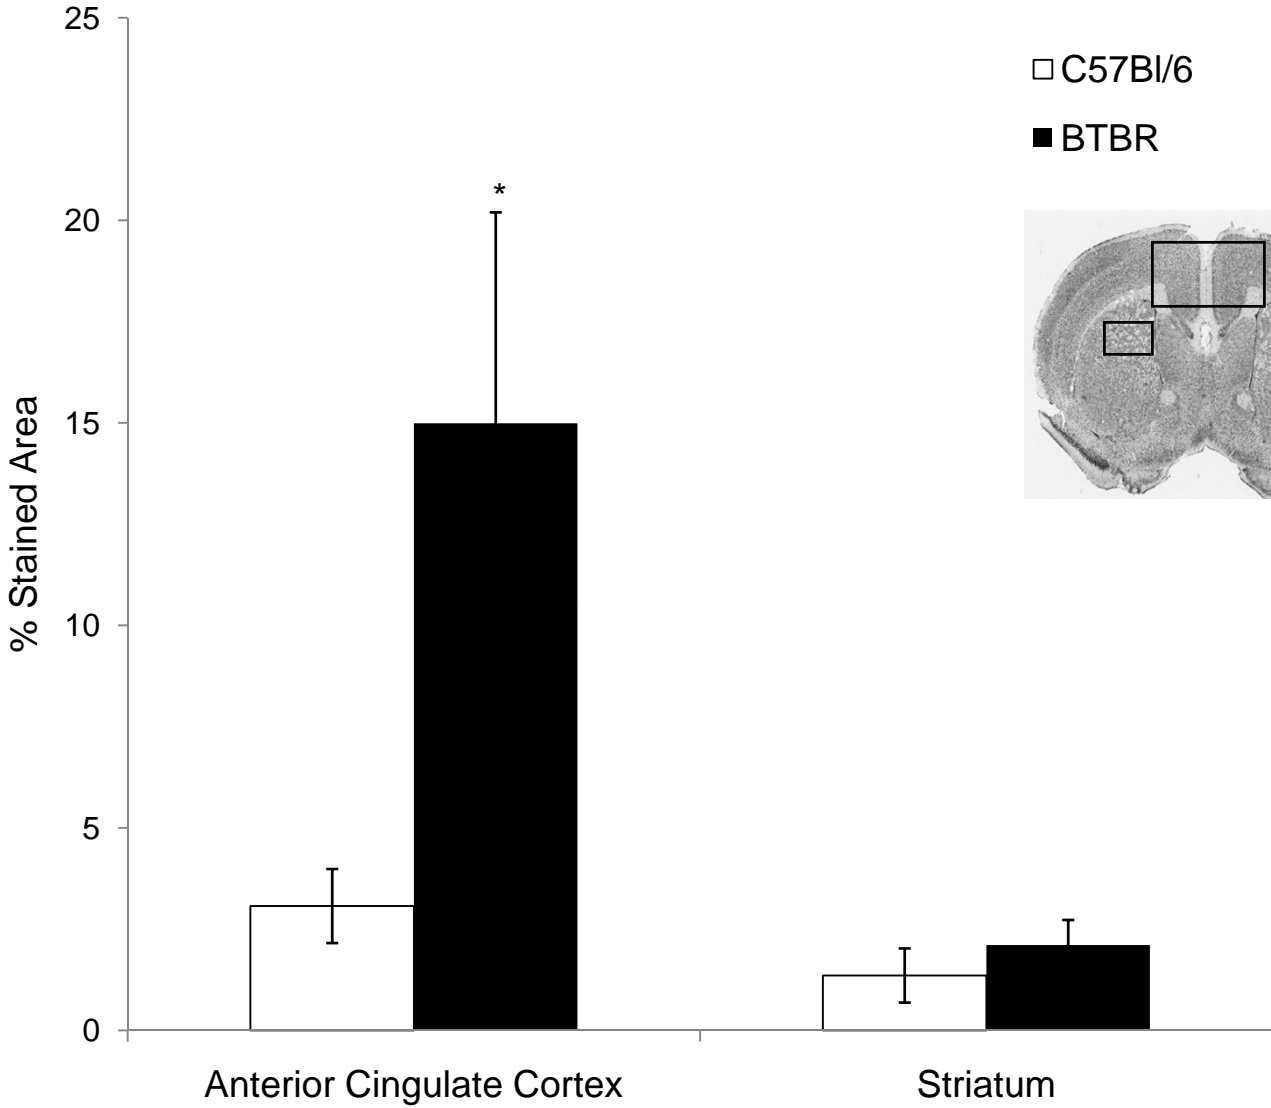

□ C57Bl/6

■ BTBR

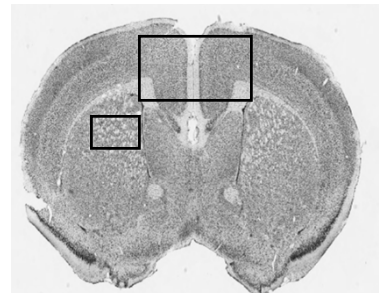

Supplement: MOESM10 [file 9676032]
